# Supplementary material for: The Overexpression of Scaffolding Protein NEDD9 Promotes Migration and Invasion in Cervical Cancer via Tyrosine Phosphorylated FAK and SRC
Source: PubMed Central journal article supplement (PMC3776827; doi:10.1371/journal.pone.0074594), 2013-09-18
Supplement: pone.0074594.s001.pdf [file pone.0074594.s001.pdf]

**Table S1. Clinicopathologic data of 89 cases in the study**

| <b>Characteristic</b> | <b>SCC</b> | <b>AC</b> | <b>Normal</b> |
|-----------------------|------------|-----------|---------------|
| <b>n</b>              | 38         | 29        | 22            |
| <b>Age</b>            |            |           |               |
| <b>Median</b>         | 46         | 41        | 50            |
| <b>Range</b>          | 33-67      | 28-71     | 40-69         |
| <b>Metastasis</b>     |            |           |               |
| <b>No-met</b>         | 22         | 22        |               |
| <b>Met</b>            | 16         | 7         |               |
| <b>FIGO stage</b>     |            |           |               |
| <b>I</b>              | 12         | 17        |               |
| <b>II</b>             | 8          | 4         |               |
| <b>III-IV</b>         | 18         | 8         |               |
| <b>Grade</b>          |            |           |               |
| <b>I</b>              | 8          | 7         |               |
| <b>II</b>             | 19         | 16        |               |
| <b>III</b>            | 11         | 6         |               |

Abbreviations: SCC, squamous carcinoma of the cervix; AC, adenocarcinoma of the cervix.
