# Supplementary material for: The Overexpression of Scaffolding Protein NEDD9 Promotes Migration and Invasion in Cervical Cancer via Tyrosine Phosphorylated FAK and SRC
Source: PubMed Central journal article supplement (PMC3776827; doi:10.1371/journal.pone.0074594), 2013-09-18
Supplement: pone.0074594.s002.pdf [file pone.0074594.s002.pdf]

**Table S2. Sequences for siRNAs, shRNA and the PCR primers used**

| Name                        | Sequence (5' - 3')                                                 |
|-----------------------------|--------------------------------------------------------------------|
| siRNA1 against NEDD9 S      | GAG ACA CCA UCU ACC AAG U[dT][dT]                                  |
| siRNA1 against NEDD9 AS     | ACU UGG UAG AUG GUG UCU C[dT][dT]                                  |
| siRNA2 against NEDD9 S      | UUA CAA AGC CCG UGG AGA A[dT][dT]                                  |
| siRNA2 against NEDD9 AS     | UUC UCC ACG GGC UUU GUA A[dT][dT]                                  |
| siRNA3 against NEDD9 S      | AGA CAC AGC UAU UGA GAG A[dT][dT]                                  |
| siRNA3 against NEDD9 AS     | UCU CUC AAU AGC UGU GUC U[dT][dT]                                  |
| siRNA against E6/E7 S       | GCA UGG AGA UAC ACC UAC A[dT][dT]                                  |
| siRNA against E6/E7 AS      | UGU AGG UGU AUC UCC AUG C[dT][dT]                                  |
| siRNA against E-cadherin S  | GGG UUA AGC ACA ACA GCA A[dT][dT]                                  |
| siRNA against E-cadherin AS | UUG CUG UUG UGC UUA ACC C[dT][dT]                                  |
| control siRNA S             | UUC UCC GAA CGU GUC ACG U[dT][dT]                                  |
| control siRNA AS            | ACG UGA CAC GUU CGG AGA A[dT][dT]                                  |
| shRNA against NEDD9         | GAG ACA CCA UCU ACC AAG U uucaagaga ACU<br>UGG UAG AUG GUG UCU CUU |
| shRNA against GFP           | GCU ACC UGU UCC AUG GCC A uucaagaga UGG<br>CCA UGG AAC AGG UAG CUU |
| Primer NEDD9 S              | ATG TCC ACG TCT TCC ACC TCC                                        |
| Primer NEDD9 AS             | AGT GAC CAG TGC CAT TAG GCT G                                      |
| Primer E6 S                 | CTG CAA GCA ACA GTT ACT GC                                         |
| Primer E6 AS                | GGC TTT TGA CAG TTA ATA CAC C                                      |
| Primer E7 S                 | CAT GGA GAT ACA CCT ACA TTG C                                      |
| Primer E7 AS                | CAC AAC CGA AGC GTA G AG TC                                        |
| Primer GAPDH S              | GAC AGT CAG CCG CAT CTT CT                                         |
| Primer GAPDH AS             | TTA AAA GCA GCC CTG GTG AC                                         |
